# Supplementary material for: Emergence of CD26+ Cancer Stem Cells with Metastatic Properties in Colorectal Carcinogenesis
Source: MDPI journal article supplement (doi:10.3390/ijms18061106), 2017-05-23
Supplement: s1 [file s1]

| Variables                  | Metastasis-free survival |         | Overall survival |         |
|----------------------------|--------------------------|---------|------------------|---------|
|                            | Hazard ratio             | P-value | Hazard ratio     | P-value |
| CD26+ level                | 1.051                    | 0.588   | 1.005            | 0.957   |
| Tumor size                 | 1.091                    | 0.487   | 1.186            | 0.33    |
| Female gender              | 0.64                     | 0.592   | 0.291            | 0.274   |
| Age                        | 1.028                    | 0.509   | 1.003            | 0.958   |
| Poor tumor differentiation | 0.473                    | 0.484   | 0.454            | 0.033   |
| Presence of metastasis     | N/A                      | N/A     | 40.41            | 0.35    |

#### SUPPLEMENTARY TABLE 1

Univariate analyses showing hazard ratio of various clinical parameters on reduced metastasis-free survival and overall survival. N/A, not applicable

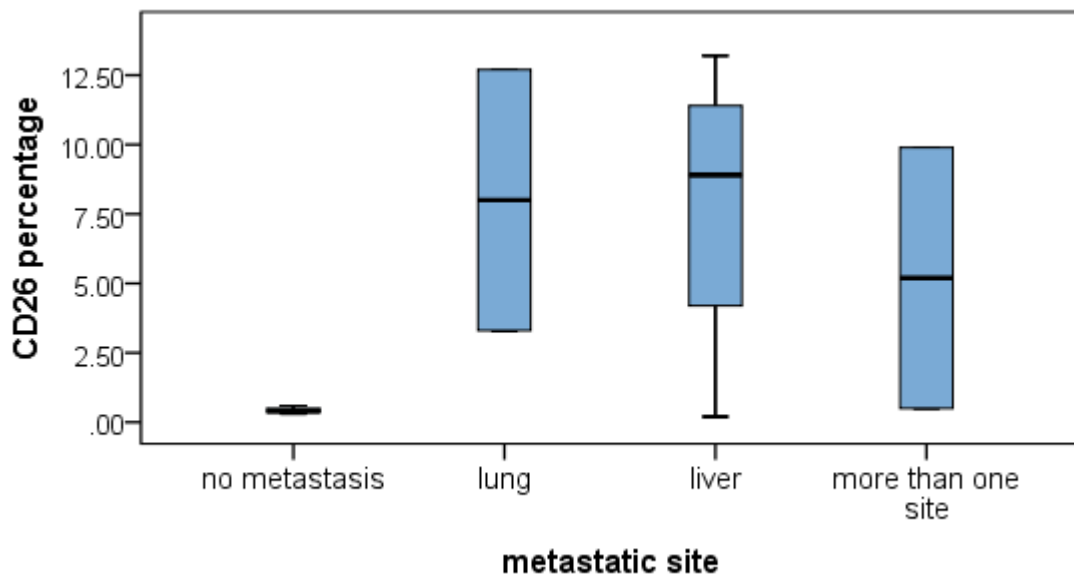

#### SUPPLEMENTARY FIGURE 1

CD26+ tumor cell count according to metastatic sites. No statistical difference was found among different metastatic sites.

A

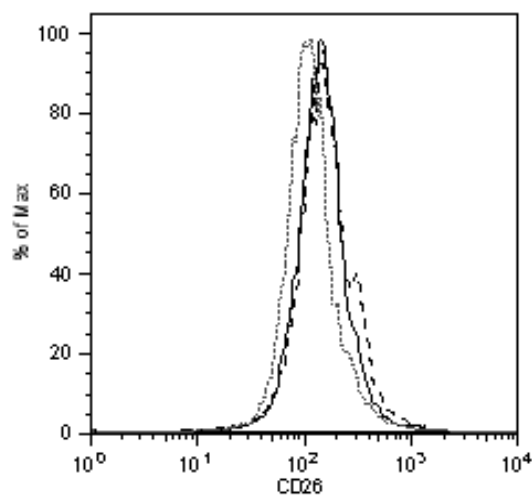

B

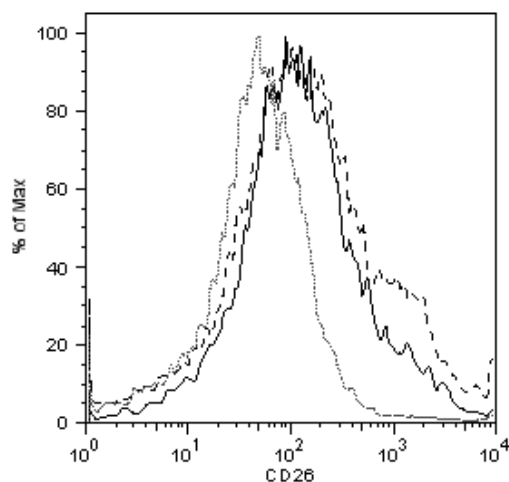

### SUPPLEMENTARY FIGURE 2

Representative flow cytometry plots of colorectal cell lines (A) SW480 and (B) SW48 treated with PI3KCA-inhibitor. Grey dotted line, isotype control. Black dashed line, untreated. Black solid line, treated with PI3KCA-inhibitor.

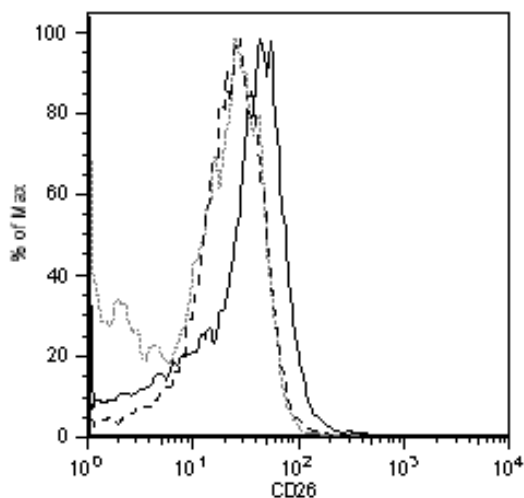

### SUPPLEMENTARY FIGURE 3

Representative flow cytometry plot of colorectal cell line SW620 treated with siTP53. Grey dotted line, isotype control. Black dashed line, untreated. Black solid line, treated with siTP53.

**A**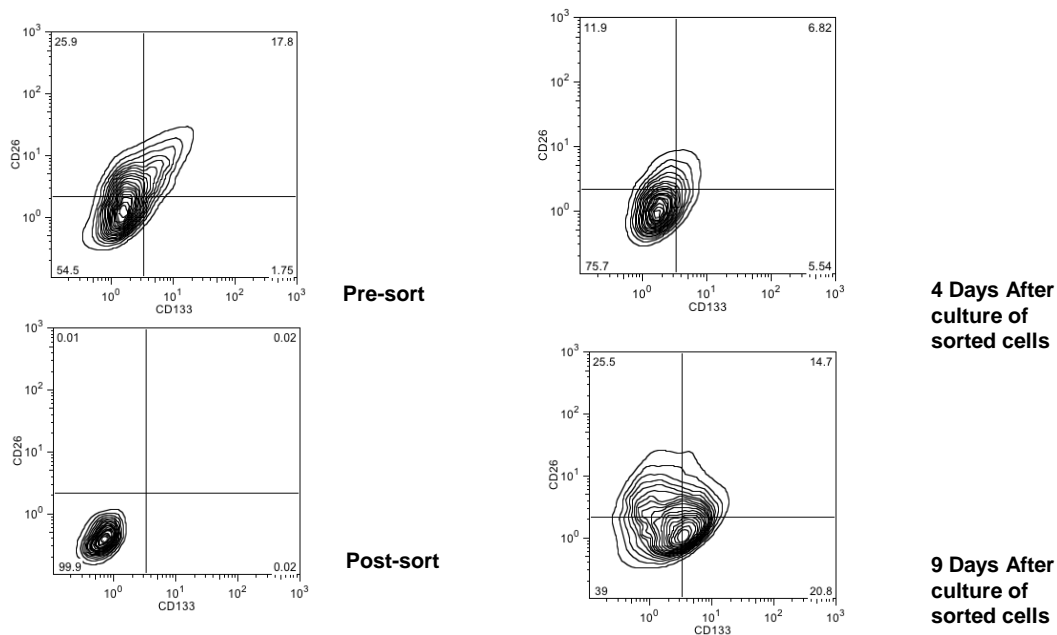**B**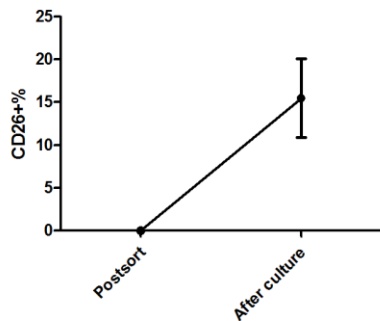**C**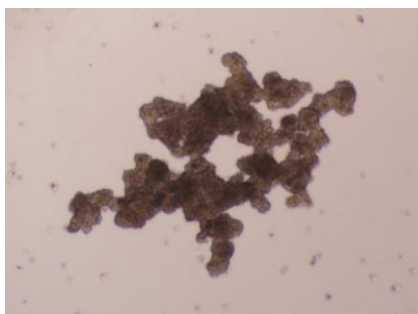**D**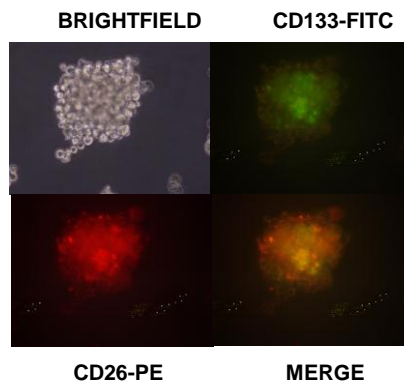

**Supplementary figure 4** CD26<sup>+</sup> cancer stem cells may emerge from non-cancer stem cells.

- (A) Sorting CD133-CD26<sup>-</sup> cell population and suspension culture. Gating was designed to select at most 10% of cells which best represented the CD133-CD26<sup>-</sup> population. Post-sort flow cytometry indicates that predominant CD133-CD26<sup>-</sup> were sorted. Flow cytometry carried on suspension culture of sorted cells on day 4 and 9 after cell sorting indicates emergence of CD133<sup>+</sup> and CD26<sup>+</sup> population. Numbers at the corners of four quadrants indicate percentage of cells in the respective quadrant. Representative flow cytometry figure of cell line HT29.
- (B) Change of CD26<sup>+</sup> population after culture of CD133-CD26<sup>-</sup> sorted cells for 4 days.
- (C) Representative spheres in sphere formation assay of the sorted CD133-CD26<sup>-</sup> cells.
- (D) Presence of CD133<sup>+</sup> and CD26<sup>+</sup> cells in tumour spheres. Immunofluorescence staining was carried out with CD133-FITC and CD26-PE, showing presence of positive cells in tumour spheres.
